# Supplementary material for: Comparison of Copper-Tolerance Genes between Different Groups of Acidovorax citrulli
Source: MDPI journal article supplement (doi:10.3390/microorganisms12040682), 2024-03-28
Supplement: s1 [file s1]

## Supplementary Materials

**Supplementary Materials:** The following supporting information can be downloaded at: [www.mdpi.com/xxx/s1](http://www.mdpi.com/xxx/s1), Table S1: Strains and plasmids used in this study; Table S2: Primers used for construction of mutant and complementary strains. Figure S1: Validation of *Acidovorax citrulli* mutant strains using target-gene-specific primers; Figure S2: Validation of the species of mutant strains using *Acidovorax citrulli*-specific primers WFB1/WFB2; Figure S3: Validation of *Acidovorax citrulli*-complementary strains using target-gene-specific primers; Figure S4: Validation of *Acidovorax citrulli*-complementary strains using Kan-F/Kan-R primers.

**Table S1.** Strains and plasmids used in this study.

| Strains or Plasmids  | Description                                                                    | Source           |
|----------------------|--------------------------------------------------------------------------------|------------------|
| Strains              |                                                                                |                  |
| A. citrulli pslb9    | Amp <sup>r</sup> , the wildtype strain (group I)                               | Lab preservation |
| A. citrulli pslb65   | Amp <sup>r</sup> , the wildtype strain (group I)                               | Lab preservation |
| A. citrulli pslbtw14 | Amp <sup>r</sup> , the wildtype strain (group II)                              | Lab preservation |
| A. citrulli Aac5     | Amp <sup>r</sup> , the wildtype strain (group II)                              | Lab preservation |
| A. citrulli pslbtw32 | Amp <sup>r</sup> , the wildtype strain (group II)                              | Lab preservation |
| A. citrulli pslbtw38 | Amp <sup>r</sup> , the wildtype strain (group II)                              | Lab preservation |
| Δ14-0032             | Amp <sup>r</sup> , <i>Aave_0032</i> gene deletion mutant derived from pslbtw14 | This study       |
| Δ65-0032             | Amp <sup>r</sup> , <i>Aave_0032</i> gene deletion mutant derived from pslb65   | This study       |
| Δ14-0033             | Amp <sup>r</sup> , <i>Aave_0033</i> gene deletion mutant derived from pslbtw14 | This study       |
| Δ65-0033             | Amp <sup>r</sup> , <i>Aave_0033</i> gene deletion mutant derived from pslb65   | This study       |
| Δ14-0034             | Amp <sup>r</sup> , <i>Aave_0034</i> gene deletion mutant derived from pslbtw14 | This study       |
| Δ65-0034             | Amp <sup>r</sup> , <i>Aave_0034</i> gene deletion mutant derived from pslb65   | This study       |
| Δ14-0038             | Amp <sup>r</sup> , <i>Aave_0038</i> gene deletion mutant derived from pslbtw14 | This study       |
| Δ65-0038             | Amp <sup>r</sup> , <i>Aave_0038</i> gene deletion mutant derived from pslb65   | This study       |
| Δ14-0039             | Amp <sup>r</sup> , <i>Aave_0039</i> gene deletion mutant derived from pslbtw14 | This study       |
| Δ65-0039             | Amp <sup>r</sup> , <i>Aave_0039</i> gene deletion mutant derived from pslb65   | This study       |
| Δ14-0387             | Amp <sup>r</sup> , <i>Aave_0387</i> gene deletion mutant derived from pslbtw14 | This study       |
| Δ65-0387             | Amp <sup>r</sup> , <i>Aave_0387</i> gene deletion mutant derived from pslb65   | This study       |
| Δ14-0388             | Amp <sup>r</sup> , <i>Aave_0388</i> gene deletion mutant derived from pslbtw14 | This study       |
| Δ65-0388             | Amp <sup>r</sup> , <i>Aave_0388</i> gene deletion mutant derived from pslb65   | This study       |
| Δ14-0389             | Amp <sup>r</sup> , <i>Aave_0389</i> gene deletion mutant derived from pslbtw14 | This study       |
| Δ65-0389             | Amp <sup>r</sup> , <i>Aave_0389</i> gene deletion mutant derived from pslb65   | This study       |

|                     |                                                                                                                                 |               |
|---------------------|---------------------------------------------------------------------------------------------------------------------------------|---------------|
| Δ14-1810            | Amp <sup>r</sup> , <i>Aave_1810</i> gene deletion mutant derived from pslbtw14                                                  | This study    |
| Δ65-1810            | Amp <sup>r</sup> , <i>Aave_1810</i> gene deletion mutant derived from pslb65                                                    | This study    |
| Δ14-1811            | Amp <sup>r</sup> , <i>Aave_1811</i> gene deletion mutant derived from pslbtw14                                                  | This study    |
| Δ65-1811            | Amp <sup>r</sup> , <i>Aave_1811</i> gene deletion mutant derived from pslb65                                                    | This study    |
| Δ14-2798            | Amp <sup>r</sup> , <i>Aave_2798</i> gene deletion mutant derived from pslbtw14                                                  | This study    |
| Δ65-2798            | Amp <sup>r</sup> , <i>Aave_2798</i> gene deletion mutant derived from pslb65                                                    | This study    |
| Δ14-4663            | Amp <sup>r</sup> , <i>Aave_4663</i> gene deletion mutant derived from pslbtw14                                                  | This study    |
| Δ65-4663            | Amp <sup>r</sup> , <i>Aave_4663</i> gene deletion mutant derived from pslb65                                                    | This study    |
| Δ65-0032p65-0032    | Amp <sup>r</sup> , Kan <sup>r</sup> , Δ65-0032 complemented with <i>Aave_0032</i> gene of pslb65                                | This study    |
| Δ14-0032p65-0032    | Amp <sup>r</sup> , Kan <sup>r</sup> , Δ14-0032 complemented with <i>Aave_0032</i> gene of pslb65                                | This study    |
| Δ65-0033p65-0033    | Amp <sup>r</sup> , Kan <sup>r</sup> , Δ65-0033 complemented with <i>Aave_0033</i> gene of pslb65                                | This study    |
| Δ14-0033p65-0033    | Amp <sup>r</sup> , Kan <sup>r</sup> , Δ14-0033 complemented with <i>Aave_0033</i> gene of pslb65                                | This study    |
| Δ65-0034p65-0034    | Amp <sup>r</sup> , Kan <sup>r</sup> , Δ65-0034 complemented with <i>Aave_0034</i> gene of pslb65                                | This study    |
| Δ14-0034p65-0034    | Amp <sup>r</sup> , Kan <sup>r</sup> , Δ14-0034 complemented with <i>Aave_0034</i> gene of pslb65                                | This study    |
| Δ65-0387p65-0387    | Amp <sup>r</sup> , Kan <sup>r</sup> , Δ65-0387 complemented with <i>Aave_0387</i> gene of pslb65                                | This study    |
| Δ14-0387p65-0387    | Amp <sup>r</sup> , Kan <sup>r</sup> , Δ14-0387 complemented with <i>Aave_0387</i> gene of pslb65                                | This study    |
| Δ65-0388p65-0388    | Amp <sup>r</sup> , Kan <sup>r</sup> , Δ65-0388 complemented with <i>Aave_0388</i> gene of pslb65                                | This study    |
| Δ14-0388p65-0388    | Amp <sup>r</sup> , Kan <sup>r</sup> , Δ14-0388 complemented with <i>Aave_0388</i> gene of pslb65                                | This study    |
| Δ65-0389p65-0389    | Amp <sup>r</sup> , Kan <sup>r</sup> , Δ65-0389 complemented with <i>Aave_0389</i> gene of pslb65                                | This study    |
| Δ14-0389p65-0389    | Amp <sup>r</sup> , Kan <sup>r</sup> , Δ14-0389 complemented with <i>Aave_0389</i> gene of pslb65                                | This study    |
| Δ65-1810p65-1810    | Amp <sup>r</sup> , Kan <sup>r</sup> , Δ65-1810 complemented with <i>Aave_1810</i> gene of pslb65                                | This study    |
| Δ14-1810p65-1810    | Amp <sup>r</sup> , Kan <sup>r</sup> , Δ14-1810 complemented with <i>Aave_1810</i> gene of pslb65                                | This study    |
| Δ65-1811p65-1811    | Amp <sup>r</sup> , Kan <sup>r</sup> , Δ65-1811 complemented with <i>Aave_1811</i> gene of pslb65                                | This study    |
| Δ14-1811p65-1811    | Amp <sup>r</sup> , Kan <sup>r</sup> , Δ14-1811 complemented with <i>Aave_1811</i> gene of pslb65                                | This study    |
| <i>E. coli</i> DH5α | Φ80 <i>lacZ</i> ΔM15Δ ( <i>lacZYA</i> -argF) U169 <i>endA1recA1</i> <i>hsdR17supE44</i> thi-1 <i>gyrA96 relA1 phoA</i> plasmids | Tiagen, China |

|               |                                                                                                      |                |
|---------------|------------------------------------------------------------------------------------------------------|----------------|
| pK18mobsacB   | Kan <sup>r</sup> , containing the <i>sacB</i> sucrose lethal site                                    | Lab collection |
| pBBR1MCS-2    | Kan <sup>r</sup> , broad host range expression vector with<br><i>lac</i> promoter                    | Lab collection |
| pK18-0032(14) | Kan <sup>r</sup> , suicide-recombinant vector used to<br>generate the mutant strain $\Delta$ 14-0032 | This study     |
| pK18-0032(65) | Kan <sup>r</sup> , suicide-recombinant vector used to<br>generate the mutant strain $\Delta$ 65-0032 | This study     |
| pK18-0033(14) | Kan <sup>r</sup> , suicide-recombinant vector used to<br>generate the mutant strain $\Delta$ 14-0033 | This study     |
| pK18-0033(65) | Kan <sup>r</sup> , suicide-recombinant vector used to<br>generate the mutant strain $\Delta$ 65-0033 | This study     |
| pK18-0034(14) | Kan <sup>r</sup> , suicide-recombinant vector used to<br>generate the mutant strain $\Delta$ 14-0034 | This study     |
| pK18-0034(65) | Kan <sup>r</sup> , suicide-recombinant vector used to<br>generate the mutant strain $\Delta$ 65-0034 | This study     |
| pK18-0038(14) | Kan <sup>r</sup> , suicide-recombinant vector used to<br>generate the mutant strain $\Delta$ 14-0038 | This study     |
| pK18-0038(65) | Kan <sup>r</sup> , suicide-recombinant vector used to<br>generate the mutant strain $\Delta$ 65-0038 | This study     |
| pK18-0039(14) | Kan <sup>r</sup> , suicide-recombinant vector used to<br>generate the mutant strain $\Delta$ 14-0039 | This study     |
| pK18-0039(65) | Kan <sup>r</sup> , suicide-recombinant vector used to<br>generate the mutant strain $\Delta$ 65-0039 | This study     |
| pK18-0387(14) | Kan <sup>r</sup> , suicide-recombinant vector used to<br>generate the mutant strain $\Delta$ 14-0387 | This study     |
| pK18-0387(65) | Kan <sup>r</sup> , suicide-recombinant vector used to<br>generate the mutant strain $\Delta$ 65-0387 | This study     |
| pK18-0388(14) | Kan <sup>r</sup> , suicide-recombinant vector used to<br>generate the mutant strain $\Delta$ 14-0388 | This study     |
| pK18-0388(65) | Kan <sup>r</sup> , suicide-recombinant vector used to<br>generate the mutant strain $\Delta$ 65-0388 | This study     |
| pK18-0389(14) | Kan <sup>r</sup> , suicide-recombinant vector used to<br>generate the mutant strain $\Delta$ 14-0389 | This study     |
| pK18-0389(65) | Kan <sup>r</sup> , suicide-recombinant vector used to<br>generate the mutant strain $\Delta$ 65-0389 | This study     |
| pK18-1810(14) | Kan <sup>r</sup> , suicide-recombinant vector used to<br>generate the mutant strain $\Delta$ 14-1810 | This study     |
| pK18-1810(65) | Kan <sup>r</sup> , suicide-recombinant vector used to<br>generate the mutant strain $\Delta$ 65-1810 | This study     |
| pK18-1811(14) | Kan <sup>r</sup> , suicide-recombinant vector used to<br>generate the mutant strain $\Delta$ 14-1811 | This study     |
| pK18-1811(65) | Kan <sup>r</sup> , suicide-recombinant vector used to<br>generate the mutant strain $\Delta$ 65-1811 | This study     |
| pK18-2798(14) | Kan <sup>r</sup> , suicide-recombinant vector used to<br>generate the mutant strain $\Delta$ 14-2798 | This study     |
| pK18-2798(65) | Kan <sup>r</sup> , suicide-recombinant vector used to<br>generate the mutant strain $\Delta$ 65-2798 | This study     |
| pK18-4663(14) | Kan <sup>r</sup> , suicide-recombinant vector used to<br>generate the mutant strain $\Delta$ 14-4663 | This study     |
| pK18-4663(65) | Kan <sup>r</sup> , suicide-recombinant vector used to<br>generate the mutant strain $\Delta$ 65-4663 | This study     |

|          |                                                                        |            |
|----------|------------------------------------------------------------------------|------------|
| p65-0032 | Kan <sup>r</sup> , pBBR1MCS-2 carrying <i>Aave_0032</i> gene of pslb65 | This study |
| p65-0033 | Kan <sup>r</sup> , pBBR1MCS-2 carrying <i>Aave_0033</i> gene of pslb65 | This study |
| p65-0034 | Kan <sup>r</sup> , pBBR1MCS-2 carrying <i>Aave_0034</i> gene of pslb65 | This study |
| p65-0387 | Kan <sup>r</sup> , pBBR1MCS-2 carrying <i>Aave_0387</i> gene of pslb65 | This study |
| p65-0388 | Kan <sup>r</sup> , pBBR1MCS-2 carrying <i>Aave_0388</i> gene of pslb65 | This study |
| p65-0389 | Kan <sup>r</sup> , pBBR1MCS-2 carrying <i>Aave_0389</i> gene of pslb65 | This study |
| p65-1810 | Kan <sup>r</sup> , pBBR1MCS-2 carrying <i>Aave_1810</i> gene of pslb65 | This study |
| p65-1811 | Kan <sup>r</sup> , pBBR1MCS-2 carrying <i>Aave_1811</i> gene of pslb65 | This study |

Note: Kan<sup>r</sup>, Cm<sup>r</sup>, and Amp<sup>r</sup> indicate resistance to kanamycin, chloramphenicol, and ampicillin, respectively.

**Table S2.** Primers used for construction of mutant and complementary strains.

| Primers | Primer Sequence (5'-3')                   | Length/bp |
|---------|-------------------------------------------|-----------|
| 0032-1F | CTATGACATGATTACGAATTCGGCTCGTAACCCGCATTG   | 587       |
| 0032-1R | CGTCAGGTATATCGCATTGCGACGGTGTAGCCCTCTTCG   |           |
| 0032-2F | CGAAGAGGGCTACACCGTCGCAATGCGATATACCTGACG   | 530       |
| 0032-2R | ACGACGGCCAGTGCCAAGCTTATGCCCAGCATGTAGTCGA  |           |
| 0032-F  | TGGTCCGCCACTACGAGG                        | 336       |
| 0032-R  | CCGCCAGATCATCCAGGA                        |           |
| 0033-1F | CTATGACATGATTACGAATTCAGCACCAGCGGAAGCGACA  | 472       |
| 0033-1R | CCTCGTAGTGGCGGACCATGGCGGGATGCAGGGATGAT    |           |
| 0033-2F | ATCATCCCTGCATCCCGCCATGGTCCGCCACTACGAGG    | 502       |
| 0033-2R | ACGACGGCCAGTGCCAAGCTTCGATGGAGGCGATGAGGAT  |           |
| 0033-F  | TGACCTGCGGCCATTGC                         | 166       |
| 0033-R  | GCAGCGACGGTGTAGCCCT                       |           |
| 0034-1F | CTATGACATGATTACGAATTCGTGTGGACATCCCTCTCGG  | 495       |
| 0034-1R | TGATGGGGCAAGCGTAACGCTTGACTCTGCCACCATGT    |           |
| 0034-2F | ACATGGTGGCAGAGTCAAGCGTTACGCTTGCCCCATCA    | 434       |
| 0034-2R | ACGACGGCCAGTGCCAAGCTTGTTGTCCCTGTCCTGCCC   |           |
| 0034-F  | TCGCTGTGGCTGTGGTTC                        | 518       |
| 0034-R  | GCCGAAACCCTGTCCACT                        |           |
| 0038-1F | CTATGACATGATTACGAATTCGACCCGACCTCCCTCTGG   | 493       |
| 0038-1R | GCCTACCGACCACTGACCGGGCCTCTTTCTTCGCGGT     |           |
| 0038-2F | ACCGCGAAGAAAGAGGCCCGGTCAGTGGTCCGTAGGC     | 542       |
| 0038-2R | ACGACGGCCAGTGCCAAGCTTTGCCATTCCAGGGTCTCCG  |           |
| 0038-F  | TGTTCTCCACACGCAGTTC                       | 360       |
| 0038-R  | GGTTCTGGAAGCTCACCTTG                      |           |
| 0039-1F | CTATGACATGATTACGAATTCGCAGTGGGGCTACCAGTACC | 406       |
| 0039-1R | GCCTCTTTCTTCGCGGTGGGAAGGCAGTGCTGTGGC      |           |
| 0039-2F | GCCACAGCACTGCCTTCCCACCGCGAAGAAAGAGGC      | 450       |
| 0039-2R | ACGACGGCCAGTGCCAAGCTTGCCCTTTAGGCGGTAGCG   |           |
| 0039-F  | TCGAGCGCAACCTCAACC                        | 534       |
| 0039-R  | CGGCCATGGACTGGAACCT                       |           |

|         |                                           |     |
|---------|-------------------------------------------|-----|
| 0387-1F | CTATGACATGATTACGAATTCCTGCGAGTTCGCCAAGGA   | 473 |
| 0387-1R | GCCTGGAAAAGAGCGGAAGCGTTCGTAGGTGGGGAT      |     |
| 0387-2F | ATCCCCACCTACGAACGCTTCCGCTCTTTTCCAGGC      | 432 |
| 0387-2R | ACGACGGCCAGTGCCAAGCTTAAAGGTAGATGGACCCCCG  |     |
| 0387-F  | GTCGGGTCTGTTCAAGGG                        | 404 |
| 0387-R  | CGCCGAGCACTTTGTAGA                        |     |
| 0388-1F | CTATGACATGATTACGAATTCAGTGCCCAATCCCGAAC    | 487 |
| 0388-1R | TGAAGAAGGAACGCACCAGCGTGATGACCCATGCGAAGA   |     |
| 0388-2F | TCTTCGCATGGGTCATCACGCTGGTGCGTTCCTTCTTCA   | 554 |
| 0388-2R | ACGACGGCCAGTGCCAAGCTTTTCCCAGGCAGAGACCGC   |     |
| 0388-F  | CTCACGACGGAAAACCCC                        | 299 |
| 0388-R  | TTGAGTTGCCCCTTGACG                        |     |
| 0389-1F | CTATGACATGATTACGAATTCGCGACGGATTTCGTCTTTCT | 494 |
| 0389-1R | CTGGGGGTACTGCTTCGCAGGGGAAAAGGCTGTCCG      |     |
| 0389-2F | GCGACAGCCTTTTCCCCTGCGAAGCAGTAACCCCCAG     | 460 |
| 0389-2R | ACGACGGCCAGTGCCAAGCTTGCATGGCGAACATCAGGAA  |     |
| 0389-F  | ACAAGCAGGCTGCAAAGG                        | 349 |
| 0389-R  | TCCAGCACGACCCAGTTG                        |     |
| 1810-1F | CTATGACATGATTACGAATTCTGCGTAGGGGCTTGTGAA   | 430 |
| 1810-1R | GATGAAGGTGTGACGCGCTTGTCTGCGTTGCATGGGT     |     |
| 1810-2F | ACCCATGCAACGCAGACAAGCGCGTCACACCTTCATC     | 431 |
| 1810-2R | ACGACGGCCAGTGCCAAGCTTAGGAGCCGAGCTTCTGGG   |     |
| 1810-F  | CGTCAACCTCTGGGGCTAC                       | 245 |
| 1810-R  | GCGGGTGGTACATGAAGG                        |     |
| 1811-1F | CTATGACATGATTACGAATTCCTCGTCTCCATCGTTCGTT  | 416 |
| 1811-1R | GGAGTGGGGGAGGACAGGCTGCGGTCATGGCTGGTG      |     |
| 1811-2F | CACCAGCCATGACCGCAGCCTGTCCTCCCCCACTCC      | 426 |
| 1811-2R | ACGACGGCCAGTGCCAAGCTTAGGCGGTTGGTGACGAAG   |     |
| 1811-F  | GTGCGTAGGGGCTTGTGA                        | 193 |
| 1811-R  | GCGAGCATGCCGTTGTAG                        |     |
| 2798-1F | CTATGACATGATTACGAATTCTTCGTCTAGTCGAGTTCCA  | 446 |
| 2798-1R | GAAATCCTGCCCATCCCCGGCGATTGACCTCATTCAAT    |     |
| 2798-2F | AATGAATGAGGTCAATCGCCGGGGATGGGCAGGATTTC    | 526 |
| 2798-2R | ACGACGGCCAGTGCCAAGCTTGCCATCAGGGCATCCAAAG  |     |
| 2798-F  | ATGGAGACCAGCGAAGCG                        | 314 |
| 2798-R  | GCGATGTCGTCGTTGCAG                        |     |
| 4663-1F | CTATGACATGATTACGAATTCACACCTGGTCGATCGGG    | 481 |
| 4663-1R | CGGGGGGACAGCTTCTTCGGAAGTTGCGGTCCGGTGT     |     |
| 4663-2F | ACACCGACCGCAACTTCCGAAGAAGCTGTCCCCCGG      | 494 |
| 4663-2R | ACGACGGCCAGTGCCAAGCTTGATGGCGAAGGCGAGGAT   |     |
| 4663-F  | CGTCTATGTCGATCTGCCCCG                     | 280 |
| 4663-R  | GTCGCCGTCGTTGAGGAA                        |     |
| WFB1    | GACCAGCCACACTGGGAC                        | 360 |
| WFB2    | CTGCCGCACTCCAGCGA                         |     |
| M13F    | CAGGAAACAGCTATGAC                         | -   |
| M13R    | GTAAAACGACGGCCAGT                         |     |
| Kan-F   | CAAGATGGATTGCACGCA                        | 738 |
| Kan-R   | CTTGAGCCTGGCGAACA                         |     |
| H0032F  | GTCGACGGTATCGATAAGCTTCCGAAGAGGGCTACACCGT  | 664 |
| H0032R  | CGCTCTAGAACTAGTGGATCCCGATGGAGGCGATGAGGA   |     |
| H0033F  | GTCGACGGTATCGATAAGCTTCCAGGGACTGCTCAGGC    | 543 |

|        |                                           |      |
|--------|-------------------------------------------|------|
| H0033R | CGCTCTAGAACTAGTGGATCCGTAAGTGGCGGACCATGCG  |      |
| H0034F | GTCGACGGTATCGATAAGCTTGGCAGGCTCCTTTTCAAAT  |      |
| H0034R | CGCTCTAGAACTAGTGGATCCACTGATGGGGCAAGCGTAA  | 2464 |
| H0387F | GTCGACGGTATCGATAAGCTTCACGGATGGGGAATAGGC   |      |
| H0387R | CGCTCTAGAACTAGTGGATCCAGACCCGGTGCACAGGAA   | 1585 |
| H0388F | GTCGACGGTATCGATAAGCTTCGAAGCAGTAACCCCCAGAA |      |
| H0388R | CGCTCTAGAACTAGTGGATCCTCGTAGGTGGGGATGAAGCT | 3326 |
| H0389F | GTCGACGGTATCGATAAGCTTGGTCCTGCGACAGCCTTT   |      |
| H0389R | CGCTCTAGAACTAGTGGATCCCTCCGTGTTCTGGGGGTT   | 1367 |
| H1810F | GTCGACGGTATCGATAAGCTTCCTGTCCTCCCCCACTCC   |      |
| H1810R | CGCTCTAGAACTAGTGGATCCATGGCGGGTTTCCTTTCC   | 1615 |
| H1811F | GTCGACGGTATCGATAAGCTTGAGGGCACCAGCCATGAC   |      |
| H1811R | CGCTCTAGAACTAGTGGATCCCCGAAGAAGTGTCTGCGTTG | 1528 |

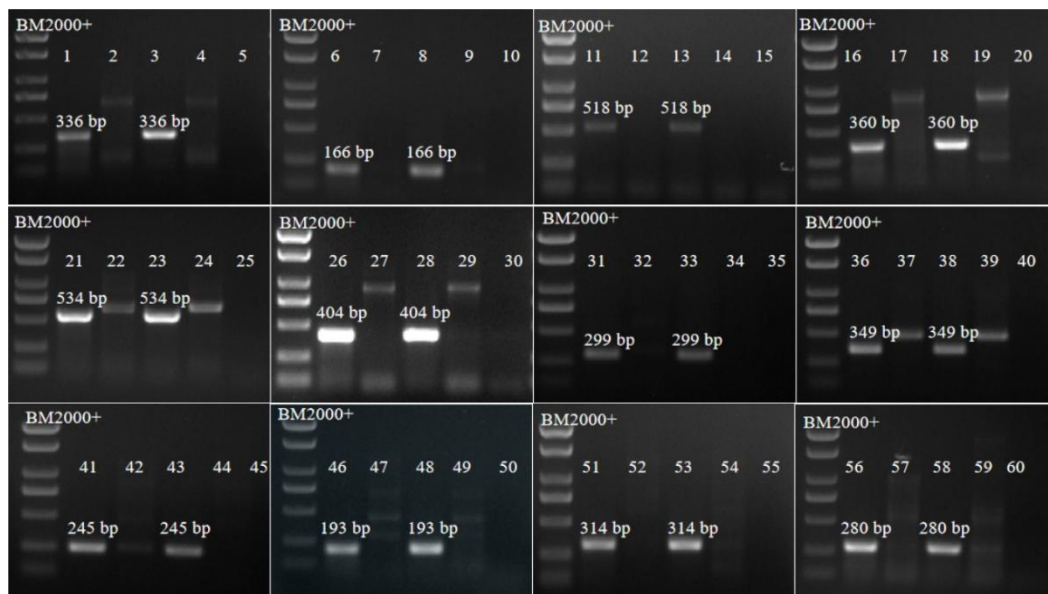

**Figure S1.** Validation of *Acidovorax citrulli* mutant strains using target-gene-specific primers. Lanes 1~5 correspond to the validation using primers 0032-F/0032-R with pslb65,  $\Delta$ 65-0032, pslbtw14,  $\Delta$ 14-0032, and the negative control as samples. Lanes 6~10 correspond to the validation using primers 0033-F/0033-R, with the same sample order as lanes 1~5. Lanes 11~15 correspond to the validation using primers 0034-F/0034-R. Lanes 16~20 correspond to the validation using primers 0038-F/0038-R. Lanes 21~25 correspond to the validation using primers 0039-F/0039-R. Lanes 26~30 correspond to the validation using primers 0387-F/0387-R. Lanes 31~35 correspond to the validation using primers 0388-F/0388-R. Lanes 36~40 correspond to the validation using primers 0389-F/0389-R. Lanes 41~45 correspond to the validation using primers 1810-F/1810-R. Lanes 46~50 correspond to the validation using primers 1811-F/1811-R. Lanes 51~55 correspond to the validation using primers 2798-F/2798-R. Lanes 56~60 correspond to the validation using primers 4663-F/4663-R.

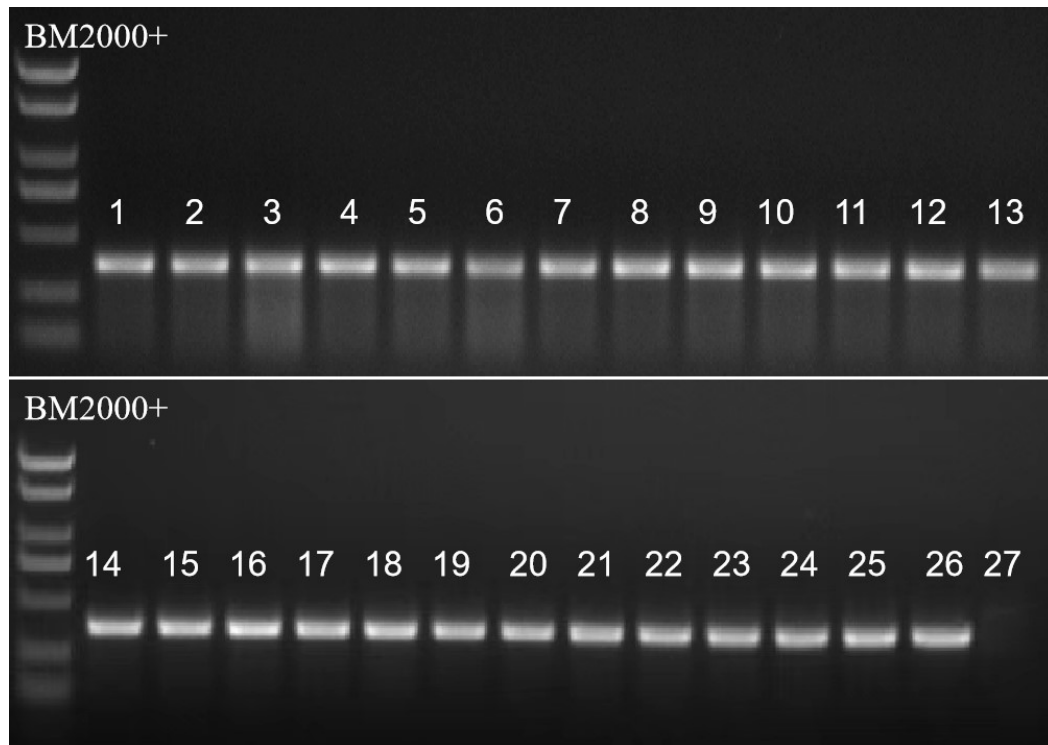

**Figure S2.** Validation of the species of mutant strains using *Acidovorax citrulli*-specific primers WFB1/WFB2. Lanes 1~27 correspond to the following strains: pslb65,  $\Delta$ 65-0032,  $\Delta$ 65-0033,  $\Delta$ 65-0034,  $\Delta$ 65-0038,  $\Delta$ 65-0039,  $\Delta$ 65-0387,  $\Delta$ 65-0388,  $\Delta$ 65-0389,  $\Delta$ 65-1810,  $\Delta$ 65-1811,  $\Delta$ 65-2798,  $\Delta$ 65-4663, pslbtw14,  $\Delta$ 14-0032,  $\Delta$ 14-0033,  $\Delta$ 14-0034,  $\Delta$ 14-0038,  $\Delta$ 14-0039,  $\Delta$ 14-0387,  $\Delta$ 14-0388,  $\Delta$ 14-0389,  $\Delta$ 14-1810,  $\Delta$ 14-1811,  $\Delta$ 14-2798,  $\Delta$ 14-4663, and the negative control.

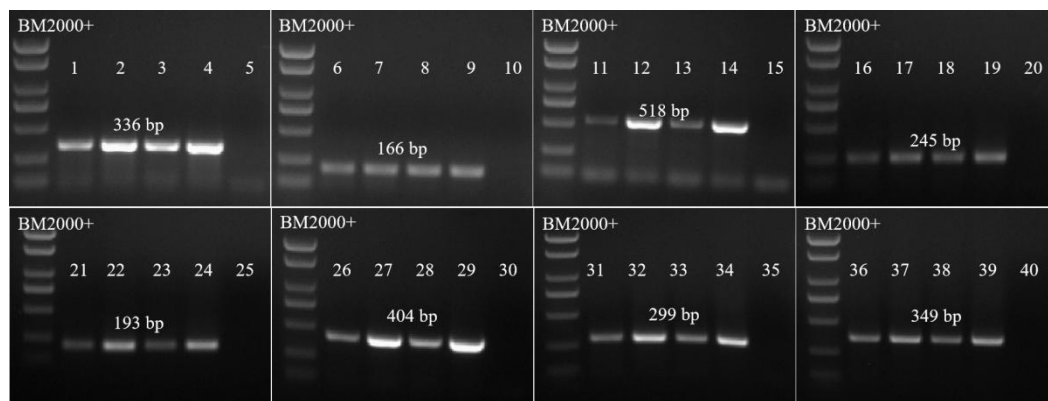

**Figure S3.** Validation of *Acidovorax citrulli*-complementary strains using target-gene-specific primers. Lanes 1~5 correspond to the validation using primers 0032-F/0032-R with pslb65,  $\Delta$ 65-0032p65-0032, pslbtw14,  $\Delta$ 14-0032p65-0032, and the negative control as samples. Lanes 6~10 correspond to the validation using primers 0033-F/0033-R, with the same sample order as lanes 1~5. Lanes 11~15 correspond to the validation using primers 0034-F/0034-R. Lanes 16~20 correspond to the validation using primers 1810-F/1810-R. Lanes 21~25 correspond to the validation using primers 1811-F/1811-R. Lanes 26~30 correspond to the validation using primers 0387-F/0387-R. Lanes 31~35 correspond to the validation using primers 0388-F/0388-R. Lanes 36~40 correspond to the validation using primers 0389-F/0389-R.

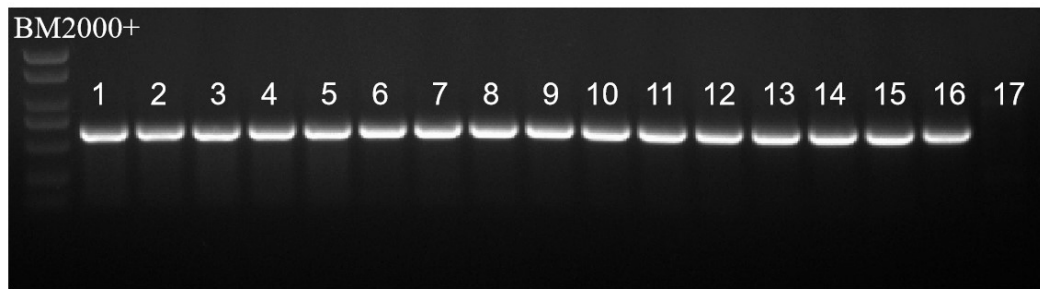

**Figure S4.** Validation of *Acidovorax citrulli*-complementary strains using Kan-F/Kan-R primers. Lanes 1~17 correspond to the following samples:  $\Delta 65-0032p65-0032$ ,  $\Delta 14-0032p65-0032$ ,  $\Delta 65-0033p65-0033$ ,  $\Delta 14-0033p65-0033$ ,  $\Delta 65-0034p65-0034$ ,  $\Delta 14-0034p65-0034$ ,  $\Delta 65-1810p65-1810$ ,  $\Delta 14-0033p65-1810$ ,  $\Delta 65-1811p65-1811$ ,  $\Delta 14-1811p65-1811$ ,  $\Delta 65-0387p65-0387$ ,  $\Delta 14-0387p65-0387$ ,  $\Delta 65-0388p65-0388$ ,  $\Delta 14-0388p65-0388$ ,  $\Delta 65-0389p65-0389$ ,  $\Delta 14-0389p65-0389$ , and the negative control.
